# Supplementary material for: A near-infrared organic light-emitting diode based on an Yb(iii) complex synthesized by vacuum co-deposition
Source: Royal Society of Chemistry journal article supplement (doi:10.1039/c7cc01580a), 2017-01-01
Supplement: c7cc01580a1.pdf [file c7cc01580a1.pdf]

**Near-infrared organic light-emitting diode based on an Yb(III) complex  
synthesized by vacuum co-deposition**

Kazuya Jinnai<sup>1</sup>, Ryota Kabe\*<sup>1,2</sup>, and Chihaya Adachi\*<sup>1,2,3</sup>

<sup>1</sup>Center for Organic Photonics and Electronics Research (OPERA), Kyushu University, 744 Motoooka, Nishi-ku, Fukuoka 819-0395, Japan

<sup>2</sup>JST, ERATO, Adachi Molecular Exciton Engineering Project, Kyushu University, 744 Motoooka, Nishi-ku, Fukuoka 819-0395, Japan

<sup>3</sup>International Institute for Carbon Neutral Energy Research (WPI-I2CNER), Kyushu University, 744 Motoooka, Nishi-ku, Fukuoka 819-0395, Japan

## Methods

MALDI-TOF-MS were measured using a matrix-assisted laser desorption/ionization time-of-flight mass spectrometer (AXIMA Confidence, SHIMADZU) in the positive mode. Elemental analyses were carried out using a Yanaco MT-5 CHN corder. FT-IR spectra were measured using a Fourier-transform infrared spectrometer (FT/IR-6100, JASCO) with a reflection-absorption spectroscopy unit (RAS PRO410-H, JASCO). The absorption spectra were measured using a UV-Vis-NIR spectrophotometer (LAMBDA 950, Perkin Elmer). The photoluminescence spectra were measured using spectrofluorometers (FluoromMax, Horiba Jobin Yvon, and Quantaaurus-QY Plus, Hamamatsu Photonics). The absolute photoluminescence quantum yields ( $\Phi_{\text{PL}}$ ) were measured using an integration sphere with an NIR photoluminescence measurement unit (Quantaaurus-QY Plus, Hamamatsu Photonics). The NIR emission lifetime ( $\tau_{\text{obs}}$ ) was obtained using a NIR PMT unit (NIR-PMT module, H12397A-75-C2, Hamamatsu Photonics), and oscilloscope (MOS6104A, Agilent Technologies) excited by 337 nm N<sub>2</sub> pulse laser (KEN-X, USHO). The electroluminescence spectra of the OLEDs were measured using calibrated multichannel spectrometers (visible region: PMA12, Hamamatsu Photonics; NIR region: C9913GC, Hamamatsu Photonics). Current density–voltage–luminance ( $J$ - $V$ - $L$ ) characteristics were measured using a semiconductor parameter analyzer (E5273A, Agilent). Voltage-luminance ( $V$ - $L$ ) characteristics were measured using a calibrated photodetector (818-IG-L, Newport).

### ***Calculation of sensitization efficiency and intrinsic quantum yield***

The sensitization efficiency ( $\eta_{\text{sens}}$ ) and the intrinsic quantum yield ( $\phi_{\text{Yb}}$ ) of  $\text{Yb}(\text{DBM})_3(\text{DPEPO})$  were calculated from equations (1) and (2)<sup>1-3</sup>.

$$\phi_{\text{PL}} = \eta_{\text{sens}}\phi_{\text{Yb}} = \eta_{\text{sens}} \frac{\tau_{\text{obs}}}{\tau_{\text{rad}}} \quad (1)$$

$$\frac{1}{\tau_{\text{rad}}} = 2303 \times \frac{8\pi n^2 \tilde{\nu}^2 (2J+1)}{N_A (2J'+1)} \int \varepsilon(\tilde{\nu}) d\tilde{\nu} \quad (2)$$

In these equations,  $\eta_{\text{sens}}$  is the sensitization efficiency parameter representing the efficiency of the ligand-to-metal energy transfer process,  $\tau_{\text{obs}}$  is the observed luminescence lifetime,  $\tau_{\text{rad}}$  is the natural radiative lifetime,  $n$  is the refractive index of the solvent,  $\tilde{\nu}$  is the wavenumber of the transition in  $\text{cm}^{-1}$ ,  $N_A$  is Avogadro's number,  $J$  and  $J'$  are the quantum numbers for the ground and excited states, and  $\varepsilon(\tilde{\nu})$  is the molar absorption coefficient. We obtained values of  $\eta_{\text{sens}} = 7.1\%$  and  $\tau_{\text{rad}} = 751.4 \mu\text{s}$  using  $\tau_{\text{obs}} = 42.6 \mu\text{s}$  from Fig. S1,  $\phi_{\text{PL}} = 0.4\%$  measured with an integrating sphere and an InGaAs photodetector (excitation at  $340 \pm 20 \text{ nm}$ ), and  $\varepsilon(\tilde{\nu})$  from Fig. S2.

### ***Synthesis of $\text{Yb}(\text{DBM})_3(\text{H}_2\text{O})_2$*** <sup>4</sup>

To a THF (40 mL) solution of HDBM (3.6 g, 16 mmol), trimethylamine (2.25 mL, 16.2 mmol) was added dropwise, and the mixture was stirred for 30 min. Then,  $\text{Yb}(\text{CH}_3\text{COO})_3(\text{H}_2\text{O})_5$  (2.2 g, 5 mmol) in 20 mL of THF was added dropwise under stirring, and the solution was heated to reflux for 4 h. After cooling, toluene was added and THF was evaporated to afford a yellow powder. The resulting solution was filtered and a yellow powder was obtained. Then, the powder was dried overnight under vacuum and purified by sublimation (3.2 g, 3.6 mmol, 72%). MALDI-TOF-MS (dithranol)  $m/z = 844.29$  ( $[\text{M} - 2\text{H}_2\text{O} + \text{H}]^+$ ); IR (KBr) 1547, 1522 (st, C=O)  $\text{cm}^{-1}$ . Elemental analysis for  $\text{C}_{45}\text{H}_{33}\text{O}_6\text{Yb}$ , calculated C 64.13%, H 3.95%, found C 64.52%, H 3.85%.

### ***Synthesis of Yb(DBM)<sub>3</sub>(DPEPO)<sup>I</sup>***

To a THF (20 mL) solution of Yb(DBM)<sub>3</sub>(H<sub>2</sub>O)<sub>2</sub> (1.39 g, 1.5 mmol), DPEPO (0.87 g, 1.5 mmol) was added under stirring, and the solution was heated to reflux for 2 h. After cooling, toluene was added, and then the solvent was evaporated to afford a yellow powder. The resulting solution was filtered, and the obtained yellow powder was then dried overnight under vacuum (1.7 g, 1.2 mmol, 83%). MALDI-TOF-MS (dithlanol)  $m/z = 1190.26$  ( $[M - DBM]^+$ ); IR (KBr) 1551, 1519 (st, C=O)  $\text{cm}^{-1}$ , 1121 (st, P=O)  $\text{cm}^{-1}$ ; Elemental analysis for C<sub>81</sub>H<sub>61</sub>O<sub>9</sub>P<sub>2</sub>Yb, calculated C 68.83%, H 4.35%, found C 68.55%, H 4.46%.

### ***Film and OLED fabrication***

Organic films were thermal evaporated onto cleaned steel substrate for MALDI-TOF-MS, gold substrates for FT-IR-RAS, and quartz substrates for optical characterization under vacuum at pressures of  $< 4 \times 10^{-4}$  Pa. The co-deposition rate was Yb(DBM)<sub>3</sub>(H<sub>2</sub>O)<sub>2</sub>:DPEPO = 0.3 Å/s:0.2 Å/s (molar ratio = 1:1) and the thickness was 100 nm.

Glass substrates with a pre-patterned, 100-nm-thick, 100 Ohm  $\text{sq}^{-2}$  tin-doped indium oxide (ITO) coating were used as anodes. Substrates were washed by sequential ultrasonication in neutral detergent, deionized water, acetone, and isopropanol and then exposed to ultraviolet–ozone (NLUV253, Nippon Laser & Electronics Lab) to remove adsorbed organic species. After cleaning, the substrates were immediately transferred into the evaporation chamber.

Organic layers were formed by thermal evaporation. Doped emitting layers were deposited by co-evaporation. Deposition was performed under vacuum at pressures  $< 4 \times 10^{-4}$  Pa. Devices were exposed to nitrogen gas once after formation of the organic layers to apply a metal mask that defines the cathode area.

OLEDs with the structure ITO/ $\alpha$ -NPD (30 nm)/mCP (10 nm)/Yb(DBM)<sub>3</sub>(H<sub>2</sub>O)<sub>2</sub>:DPEPO (30 nm)/DPEPO (10 nm)/TPBi (40 nm)/LiF (0.8 nm)/Al (100 nm) were fabricated. The deposition rates of the Yb(DBM)<sub>3</sub>(H<sub>2</sub>O)<sub>2</sub>:DPEPO layers were 0.3 Å/s:0.81 Å/s (molar ratio = 1:4), 0.3 Å/s:0.2 Å/s (molar ratio = 1:1), and 0.3 Å/s (Yb(DBM)<sub>3</sub> neat).

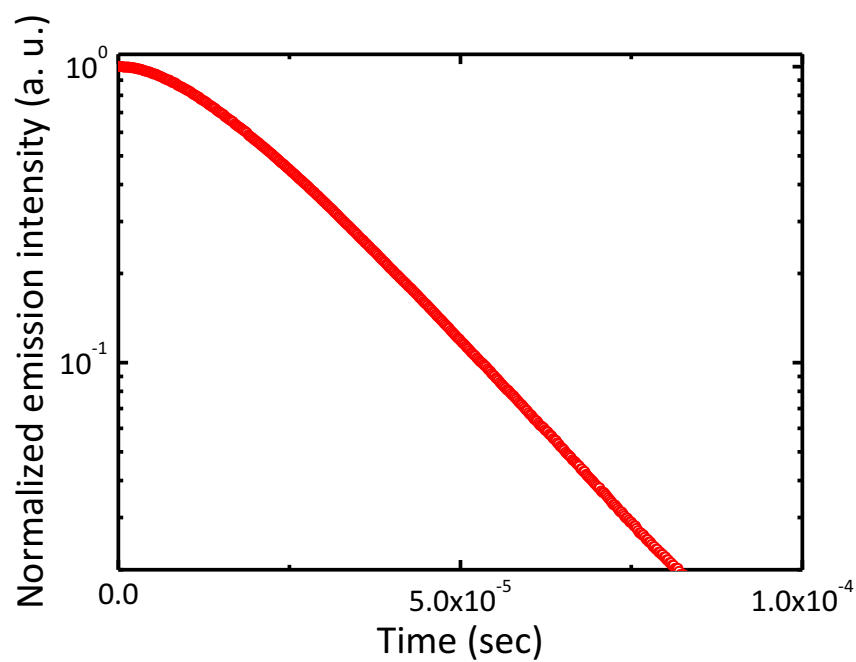

**Fig. S1.** NIR emission decay curve of  $\text{Yb}(\text{DBM})_3(\text{DPEPO})$  in DMSO solution ( $4.5 \times 10^{-3}$  M, excited at 337 nm) measured using an NIR photomultiplier tube.

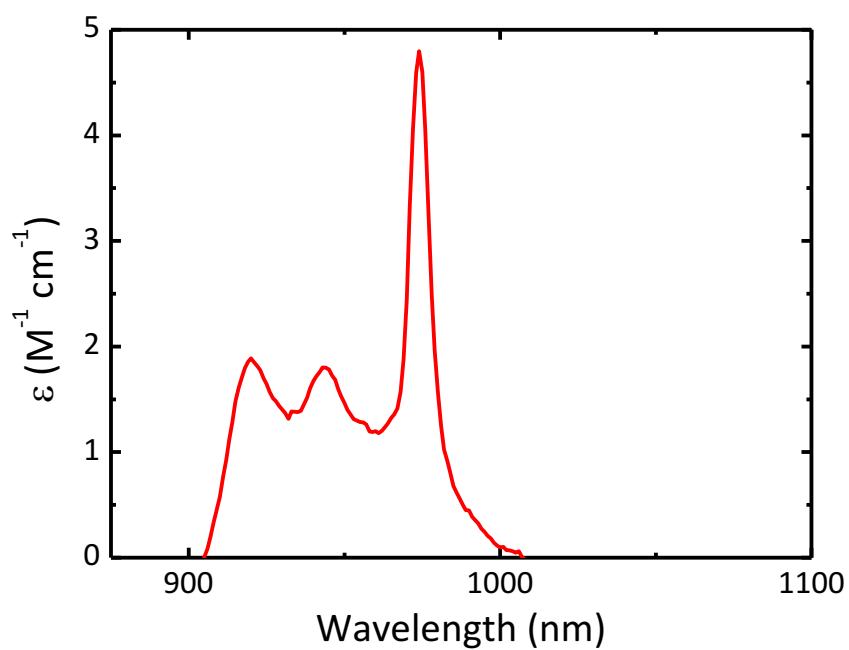

**Fig S2.** NIR absorption spectrum of  $\text{Yb}(\text{DBM})_3(\text{DPEPO})$  in DMSO solution ( $4.5 \times 10^{-3}$  M).

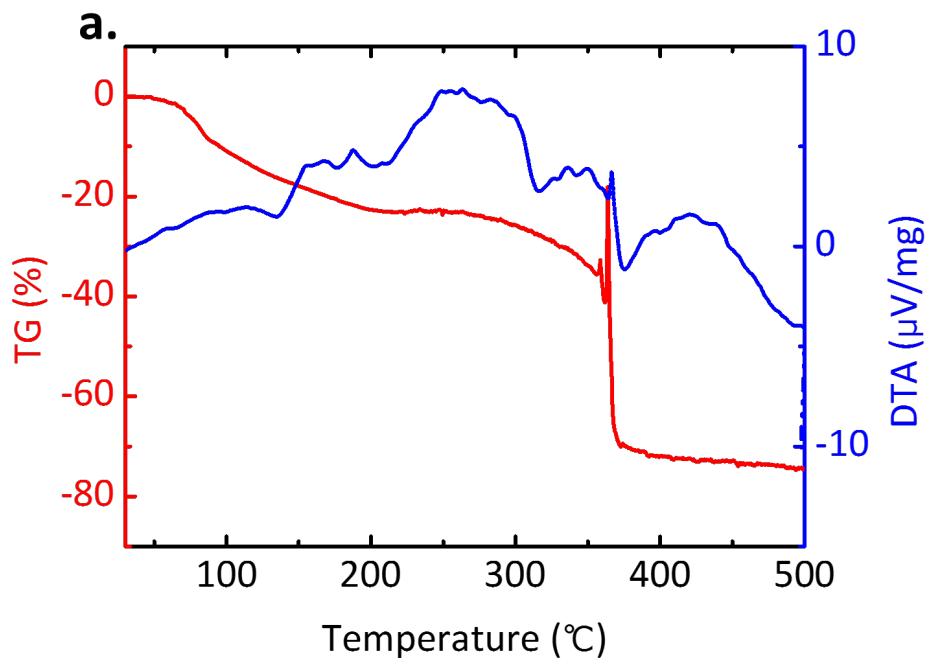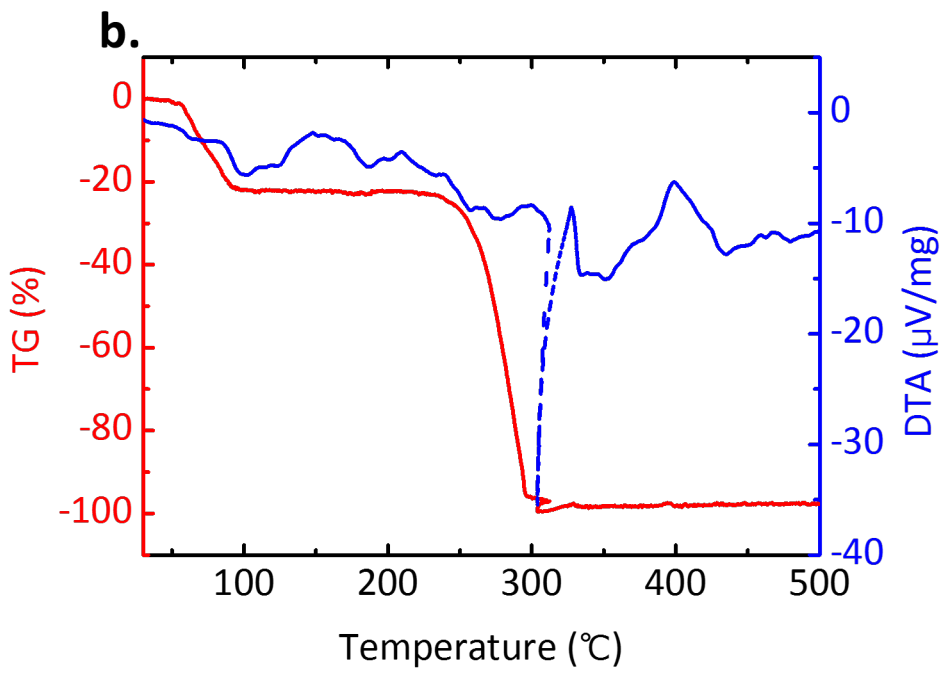

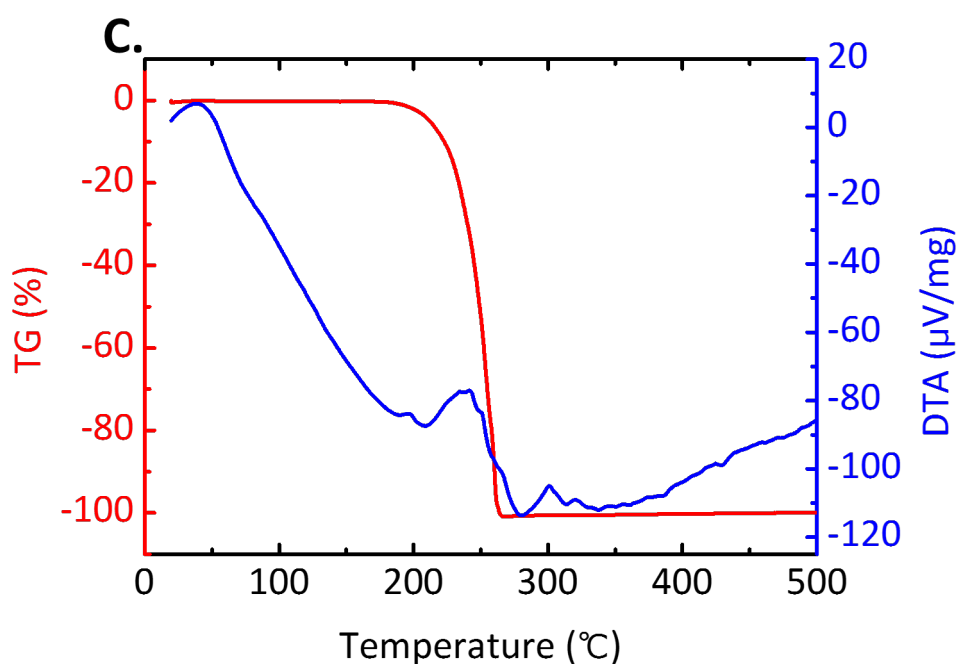

**Fig. S3.** (a) TG-DTA of  $\text{Yb}(\text{DBM})_3(\text{DPEPO})$ , (b)  $\text{Yb}(\text{DBM})_3(\text{H}_2\text{O})_2$  and (c) DPEPO under 1 Pa.

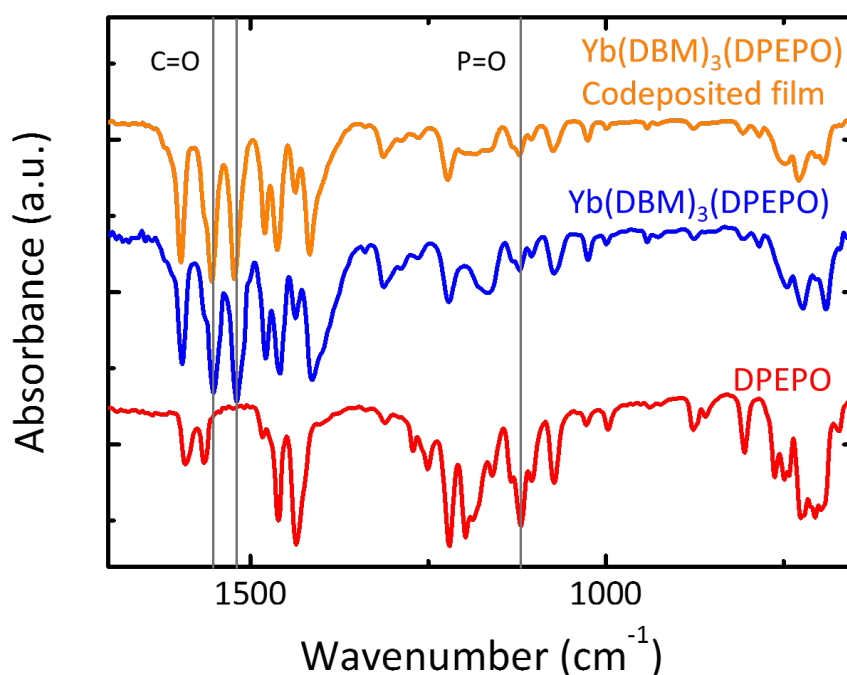

**Fig. S4.** FT-IR-RAS spectra of DPEPO (red), synthesized  $\text{Yb}(\text{DBM})_3(\text{H}_2\text{O})_2$  (blue), deposited  $\text{Yb}(\text{DBM})_3(\text{H}_2\text{O})_2$  film (green), synthesized  $\text{Yb}(\text{DBM})_3(\text{DPEPO})$  (orange), and co-deposited  $\text{Yb}(\text{DBM})_3(\text{DPEPO})$  film (purple).

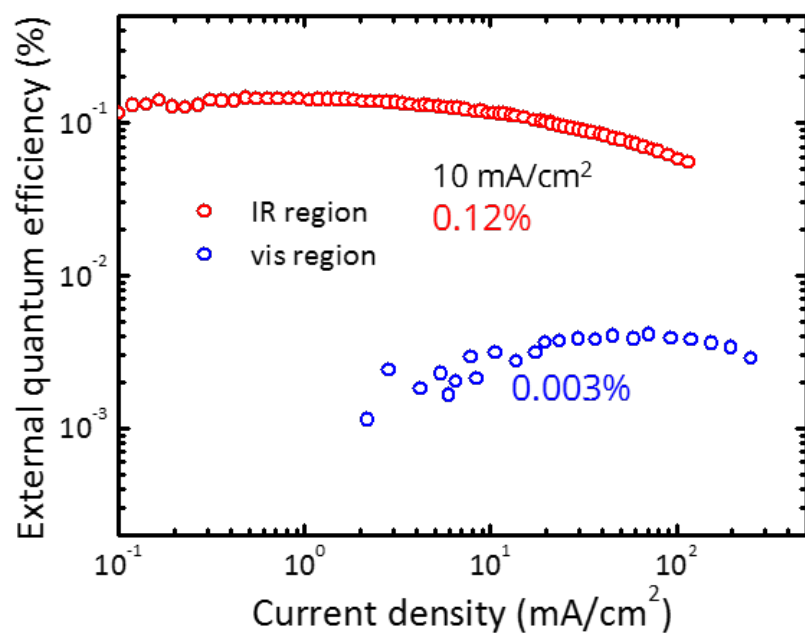

**Fig. S5.** Comparison of the  $\eta_{\text{EQE}}-J$  characteristics of device B in the IR and vis regions.

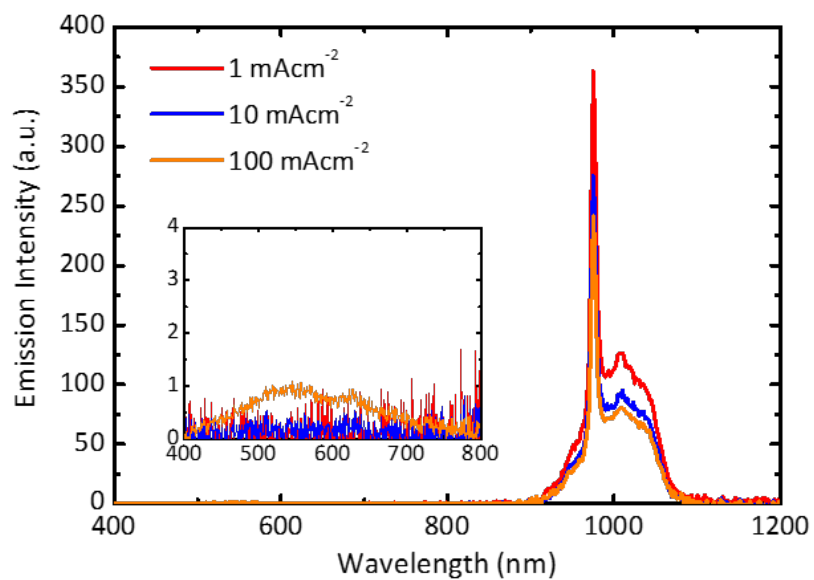

**Fig. S6.** The current density dependence of EL intensity of device B.



## References

- 1 F. Artizzu, F. Quochi, M. Saba, L. Marchiò, D. Espa, A. Serpe, A. Mura, M. L. Mercuri, G. Bongiovanni and P. Deplano, *Chempluschem*, 2012, **77**, 240–248.
- 2 S. J. Strickler and R. a. Berg, *J. Chem. Phys.*, 1962, **37**, 814.
- 3 A. Aebischer, F. Gumy and J.-C. G. Bünzli, *Phys. Chem. Chem. Phys.*, 2009, **11**, 1346–1353.
- 4 J. Wang, C. Han, G. Xie, Y. Wei, Q. Xue, P. Yan and H. Xu, *Chem. - A Eur. J.*, 2014, **20**, 11137–11148.
